# Supplementary material for: Electrospun nerve guide conduits have the potential to bridge peripheral nerve injuries in vivo
Source: PubMed Central journal article supplement (PMC6233209; doi:10.1038/s41598-018-34699-8), 2018-11-13
Supplement: 41598_2018_34699_MOESM1_ESM.pdf [file 41598_2018_34699_MOESM1_ESM.pdf]

# **Electrospun nerve guide conduits have the potential to bridge peripheral nerve injuries in vivo**

**FROST Hanna K<sup>\*1,2</sup>, ANDERSSON Tomas<sup>3</sup>, JOHANSSON Sebastian<sup>3</sup>, ENGLUND –JOHANSSON U<sup>4</sup>, EKSTRÖM Per<sup>4</sup>, DAHLIN Lars B<sup>1,2</sup>, JOHANSSON Fredrik<sup>3</sup>.**

<sup>1</sup>Department of Translational Medicine – Hand Surgery, Lund University, SE-205 02 Malmö, Sweden

<sup>2</sup> Department of Hand Surgery, Skåne University Hospital, SE-205 02 Malmö, Sweden

<sup>3</sup> Department of Biology, Lund University, SE-223 62 Lund, Sweden

<sup>4</sup> Department of Clinical Sciences, Lund - Ophthalmology, Lund University, SE-211 84, Sweden

\*Correspondence to [Hanna.Frost@med.lu.se](mailto:Hanna.Frost@med.lu.se)

E-mail addresses: [Hanna.Frost@med.lu.se](mailto:Hanna.Frost@med.lu.se) (H. Frost), [seb.m.johansson@gmail.com](mailto:seb.m.johansson@gmail.com) (S. Johansson), [tomas.k.andersson@gmail.com](mailto:tomas.k.andersson@gmail.com) (T.

Andersson), [Ulrica.Englund\\_johansson@med.lu.se](mailto:Ulrica.Englund_johansson@med.lu.se) (U Englund-Johansson), [Per.Ekstrom@med.lu.se](mailto:Per.Ekstrom@med.lu.se) (P. Ekström), [Lars.Dahlin@med.lu.se](mailto:Lars.Dahlin@med.lu.se) (LB.

Dahlin), [Per\\_Fredrik.Johansson@biol.lu.se](mailto:Per_Fredrik.Johansson@biol.lu.se) (F. Johansson)

**Table S1. Nerve regeneration after nerve injury and reconstruction with PCL nerve guide**

|                                         | Autograft            | Hollow tube           | PCL nerve guide                   | PCL nerve guide+cells | p-values (KW)  |
|-----------------------------------------|----------------------|-----------------------|-----------------------------------|-----------------------|----------------|
| <b>NF per mm<sup>2</sup></b>            | n=5                  | n=2                   | n=3                               | n=2                   |                |
| prox                                    | 32235 (30146, 34026) | 3326 (2875, 3776)     | 3326 (2875, 3776)                 |                       | p=0.153        |
| 2mm                                     | 22037 (12436, 26962) | 2050 (1047, 5106)     | 2050 (1047, 5106)                 | 2234 (972, 3496)      | p=0.075        |
| 5mm                                     | 19785 (16565, 23005) | 664 (611, 718)        | 664 (611, 718)                    | 1642 (972, 2313)      | p=0.112        |
| 8mm                                     | 17088 (15123, 22982) | 991 (761, 1221)       | 991 (761, 1221)                   | 870 <sup>†</sup>      | p=0.081        |
| dist                                    | 3507 (0, 10745)      |                       | 746 (149, 1343)                   | 448 <sup>†</sup>      | p=0.570        |
| <b>Hoechst 33342 per mm<sup>2</sup></b> | n=5                  | n=2                   | n=4                               | n=2                   |                |
| prox                                    | 12237 (7760, 13133)  | 15670 <sup>†</sup>    | 12834 (12685, 14774)              | 12536 <sup>†</sup>    | p=0.130        |
| 2mm                                     | 21639 (8506, 23380)  | 27061 <sup>†</sup>    | 14749 (10447, 20296)              | 16167 (13730, 18605)  | p=0.307        |
| 5mm                                     | 19351 (15471, 27310) | 66012 (25669, 106355) | 14177 (10546, 14426) <sup>a</sup> | 14600 (11939, 17262)  | <b>p=0.040</b> |
| 8mm                                     | 20097 (17311, 21440) | 24475 <sup>†</sup>    | 10049 (5820, 12188) <sup>a</sup>  | 15446 (15322, 15570)  | <b>p=0.020</b> |
| dist                                    | 16267 (14177, 19550) | 13730 <sup>†</sup>    | 15297 (12237, 18804)              | 15670 (14476, 16864)  | p=0.517        |
| <b>ED1 per mm<sup>2</sup></b>           | n=5                  | n=3                   | n=3                               | n=2                   |                |
| prox                                    | 454 (48, 883)        | 167 <sup>†</sup>      | 1122 (24, 1170)                   | 263 <sup>†</sup>      | p=0.963        |
| 2mm                                     | 1703 (24, 2260)      | 2260 (1242, 3852)     | 485 (40, 1504)                    | 1839 (1321, 2356)     | p=0.280        |
| 5mm                                     | 1031 (637, 1425)     | 1655 (1464, 5587)     | 527 (334, 2650)                   | 1327 (1186, 1468)     | p=0.259        |
| 8mm                                     | 1401 (1337, 1854)    | 3868 (1051, 6685)     | 850 (167, 1743)                   | 1166 (883, 1449)      | p=0.508        |
| dist                                    | 1647 (48, 2244)      | 4775 (4202, 5348)     | 728 (454, 1289)                   | 1391 (1170, 1612)     | p=0.095        |
| <b>S100 per mm<sup>2</sup></b>          | n=5                  | n=2                   | n=4                               | n=2                   |                |
| prox                                    | 96 (0, 167)          | 669 <sup>†</sup>      | 24 (0, 167)                       | 167 <sup>†</sup>      | p=0.435        |
| 2mm                                     | 72 (0, 111)          | 905 (414, 1396)       | 621 (493, 836)                    | 489 (119, 860)        | p=0.059        |
| 5mm                                     | 48 (48, 127)         | 658 (350, 966)        | 1019 (0, 1592)                    | 561 (478, 645)        | p=0.239        |
| 8mm                                     | 135 (0, 382)         | 1487 <sup>†</sup>     | 852 (382, 1098) <sup>a</sup>      | 1242 <sup>†</sup>     | <b>p=0.049</b> |
| dist                                    | 60 (0, 143)          | 3629 <sup>†</sup>     | 669 <sup>†</sup>                  | 609 (454, 764)        | p=0.075        |

**Table S1. Nerve regeneration after nerve injury and reconstruction with PCL nerve guide.**

Data from the initial PCL-tube study analyzed on photographs of transverse sections at different tube levels. Due to a high degree of automutilation and processing difficulties, groups are small. Values are expressed as median (min, max), and are based on the average of three observations per specimen, except for proximal and distal to the nerve injury, where the nerve was uniform. For the hollow tube, values are based on a single observation per specimen due to a shortage of sections and a uniform distribution of cells. KW= Kruskal-Wallis. Statistical significance ( $p < 0.05$ ) based on the Mann-Whitney U-test is indicated as: <sup>a</sup> sign. difference from group 1 (autologous nerve graft). <sup>†</sup> denotes that observation is based on a single specimen.
